# Supplementary material for: Diagnostic Peptide Discovery: Prioritization of Pathogen Diagnostic Markers Using Multiple Features
Source: PLOS journal article supplement (doi:10.1371/journal.pone.0050748), 2012-12-14
Supplement: S2 (10.1371/journal.pone.0050748.s002) [file journal.pone.0050748.s002]

# A

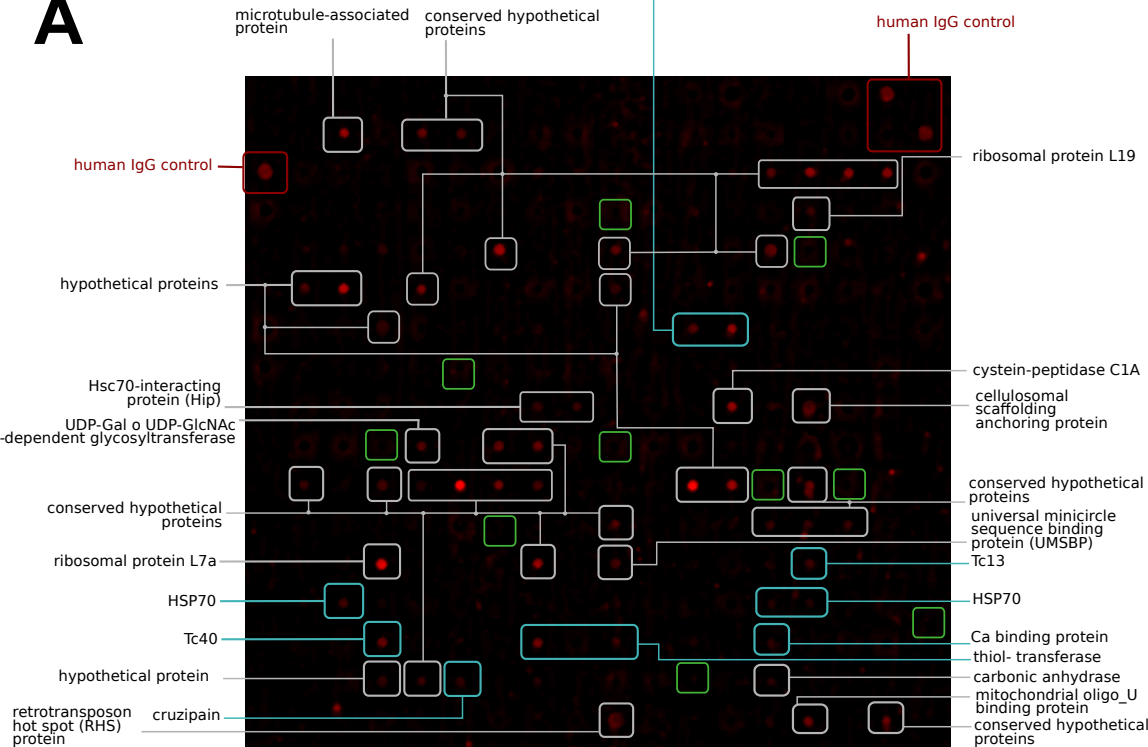

# B

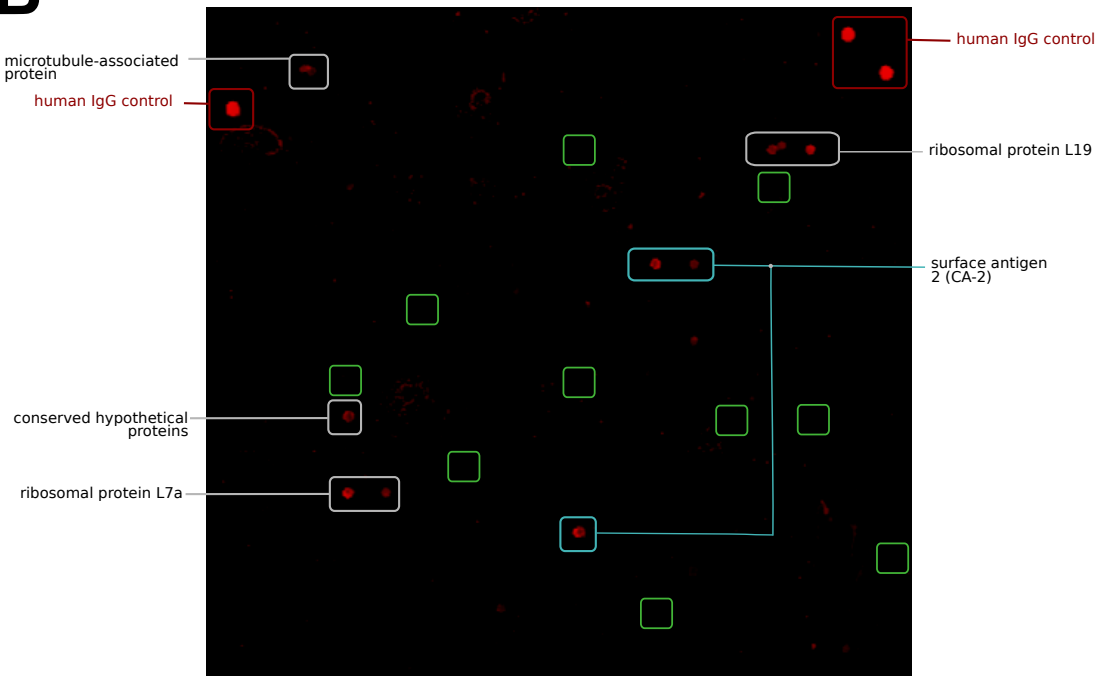

- Positive control (binding of secondary antibody)
- Curated epitopes (reactive in these subarrays)
- Reactive High-scoring candidates
- Negative controls
