# Supplementary material for: Diagnostic Peptide Discovery: Prioritization of Pathogen Diagnostic Markers Using Multiple Features
Source: PLoS One. 2012 Dec 14;7(12):e50748. doi: 10.1371/journal.pone.0050748 (PMC3522711; doi:10.1371/journal.pone.0050748)
Supplement: Table S1 — Complete list of reactive peptides. Peptides displaying at least one T. cruzi positive assay with at most 1 healthy individual (control) positive are listed, showing the corresponding Locus Identifier, protein description, amino acid start position, sequence, prioritization score and the percentage of assayed samples in which the peptide was positive for T. cruzi infected, healthy control and Leishmania infected subjects (e.g. peptide n42 reacted in 4 of 5 -80%- of the T. cruzi samples). Letters n and c in Peptide ID indicate “novel” (highly ranked) and “curated” peptides, respectively. Data available in File: Table S1.xls (XLS) [file pone.0050748.s004.xls]

## Sheet: Sheet1
Carmona SJ, Sartor P, Leguizamon MS, Campetella OE, Aguero F (2012). Supplementary Table 1.
Peptide ID	Gene Name	Description	AA Pos.	Sequence	Score	T. cruzi+ (N=5)	Healthy+ (N=5)	Leishmania+ N=2
n42	TcCLB.508175.329	60S ribosomal protein L19, putative	335	PAKAAAAPAKAA	10.568	0.8	0	0
n67	TcCLB.509149.40	60S ribosomal protein L19, putative	275	APPAKAAAPPAK	12.84	0.8	0	0
n126	TcCLB.504159.10	hypothetical protein, conserved	443	APAVGGFGSAAH	6.914	0.8	0	0
n86	TcCLB.508831.150	hypothetical protein, conserved	47	SPFKSVFGAPSS	7.298	0.6	0	0.5
n90	TcCLB.506239.30	lectin, putative	409	EQPQHYEQPQQH	13.542	0.6	0	0
n96	TcCLB.511671.50	hypothetical protein, conserved	47	ESPFKSVFGAPS	7.102	0.6	0	0
n25	TcCLB.510305.70	hypothetical protein, conserved	457	FPVVGMPRPGGF	8.906	0.6	0.2	0.5
n1	TcCLB.511633.79	microtubule-associated protein, putative	239	DVGPRHVDPDHF	11.475	0.4	0	0
n26	TcCLB.510305.70	hypothetical protein, conserved	463	PRPGGFPVVGMP	8.618	0.4	0	0
n38	TcCLB.508175.329	60S ribosomal protein L19, putative	233	AAAAPAKAAAAP	10.675	0.4	0	0
n40	TcCLB.508175.329	60S ribosomal protein L19, putative	273	AKAATAPAKAAA	8.939	0.4	0	0
n85	TcCLB.508831.150	hypothetical protein, conserved	41	EKPPAESPFKSV	8.153	0.4	0	0
n87	TcCLB.508831.150	hypothetical protein, conserved	53	FGAPSSTAAKPP	7.732	0.4	0	0
n88	TcCLB.506239.30	lectin, putative	363	HEQPQHYEQPQH	12.987	0.4	0	0
n41	TcCLB.508175.329	60S ribosomal protein L19, putative	323	KAATAPAKAAAA	9.91	0.4	0.2	0
n154	TcCLB.506441.20	hypothetical protein, conserved	677	ERSGREGRERGY	9.564	0.4	0.2	0.5
n190	TcCLB.508719.70	hypothetical protein, conserved	390	RCRGVYAPKTGT	6.757	0.4	0.2	0.5
n24	TcCLB.510305.70	hypothetical protein, conserved	451	MPRPGGFPVVGM	8.72	0.2	0	0.5
n28	TcCLB.506177.20	lectin, putative	347	QYEQPQQHYEQP	12.745	0.2	0	0
n31	TcCLB.506177.20	lectin, putative	393	QPQQHEQPQQYE	12.943	0.2	0	0
n44	TcCLB.508385.10	hypothetical protein, conserved	1313	GQYSPQHPQWNA	8.002	0.2	0	0
n51	TcCLB.506791.30	hypothetical protein, conserved	1775	DPGPPVPAFTFA	7.34	0.2	0	0
n56	TcCLB.510217.10	hypothetical protein	95	SPEPSAAWRNFA	9.23	0.2	0	0
n63	TcCLB.506559.559	antigenic protein, putative	2209	RQPFVLPEPQET	10.345	0.2	0	0
n74	TcCLB.506959.90	hypothetical protein, conserved	123	TAPAAPEPPRTA	9.456	0.2	0	0
n77	TcCLB.508677.60	hypothetical protein	99	RGGPCPPNPAPP	11.676	0.2	0	0
n89	TcCLB.506239.30	lectin, putative	407	HYEQPQHYEQPQ	13.485	0.2	0	0
n97	TcCLB.511671.50	hypothetical protein, conserved	53	VFGAPSSTAAKP	7.344	0.2	0	0
n112	TcCLB.508595.20	UDP-Gal-dependent glycosyltransferase	41	GAPGPNNPRHPR	11.759	0.2	0	0.5
n115	TcCLB.506147.190	hypothetical protein, conserved	253	PSKPSPKAAPKK	9.824	0.2	0	0
n122	TcCLB.510565.11	tyrosine aminotransferase, putative	27	KPSPSPKPIIKL	7.98	0.2	0	0
n124	TcCLB.510733.50	hypothetical protein, conserved	99	KPSPKAAPKKAM	10.02	0.2	0	0.5
n129	TcCLB.510877.40	hypothetical protein, conserved	173	RGGRGGGRGNNS	12.128	0.2	0	0
n135	TcCLB.511861.120	hypothetical protein	97	PRPCVPDGGPTD	9.845	0.2	0	0
n136	TcCLB.511861.120	hypothetical protein	101	VPDGGPTDVWTG	10.259	0.2	0	0
n147	TcCLB.504625.70	kinetoplast DNA-associated protein, putative	443	VAREEAARRMHE	9.559	0.2	0	0
n152	TcCLB.506441.20	hypothetical protein, conserved	665	RGYPEEKEDSRR	9.87	0.2	0	0.5
n161	TcCLB.503975.100	hypothetical protein, conserved	343	AGPYGGMGGNGA	7.017	0.2	0	0
n165	TcCLB.507603.260	cathepsin L-like, putative	353	APGPSPSYFVQM	11.647	0.2	0	0
n184	TcCLB.463155.20	retrotransposon hot spot (RHS) protein	511	PRVLIGTPGIGN	7.556	0.2	0	0
n186	TcCLB.511815.170	hypothetical protein, conserved	50	KEEVPEEVNAPE	10.093	0.2	0	0
n176	TcCLB.511233.20	60S ribosomal protein L34, putative	111	HAKSQKEKKRRD	10.745	0.2	0.2	0
n183	TcCLB.511345.10	retrotransposon hot spot (RHS) protein	539	FPLVDGFFFVDT	4.524	0.2	0.2	0.5
Curated (validated) epitopes*
Peptide ID	Gene Name	Description	AA Pos.	Sequence	Score	T. cruzi+ (N=5)	Healthy+ (N=5)	Leishmania+ N=2
c1	TcCLB.505975.20	TcD / Ag13	903	KPAEPKSAEPKP	13.101	0.8	0	0
c2	TcCLB.505975.20	TcD / Ag13	905	AEPKSAEPKPAE	13.098	0.8	0	0
c10	TcCLB.506303.80	R27-2 / FRA / JL8	1145	ATKVAEAEKQKA	8.232	0.6	0	0
c12	TcCLB.506303.80	R27-2 / FRA / JL8	1153	KQKAAEATKVAE	8.241	0.6	0	0
c7	TcCLB.508831.140	B13 / Ag2 / CA-2	217	DKPSPFGQAAAG	8.657	0.4	0	0
c8	TcCLB.508831.140	B13 / Ag2 / CA-2	589	GKPSPFGQAAAG	8.237	0.4	0	0
c19	TcCLB.506659.10	Tc40	409	AKAAAPPAAARS	3.966	0.4	0	0
c11	TcCLB.506303.80	R27-2 / FRA / JL8	1149	AEAEKQKAAEAT	8.268	0.2	0	0
c17	TcCLB.508355.250	60S acidic ribosomal protein P0	311	EDDDDDFGMGA	8.066	0.2	0	0
c24	TcCLB.503419.30	thiol-transferase Tc52**	71	SRYIDRISSPAN	1.732	0.2	0	0
c28	TcCLB.509391.30	flagellar calcium-binding protein 3**	33	RIRQAIPREKTA	7.633	0.2	0	0
c35	TcCLB.507511.91	TSSA	39	ENKPATGEAPSQ	6.883	0.2	0	0
c36	TcCLB.507511.91	TSSA	41	KPATGEAPSQPG	7.288	0.2	0	0
c22	TcCLB.503419.30	thiol-transferase Tc52**	41	PQWYKELNPRET	3.893	0.2	0.2	0.5
c27	TcCLB.509391.30	flagellar calcium-binding protein 3**	27	RKEAWERIRQAI	6.967	0.2	0.2	0.5
* Bibliographic references for validated antigens can be found in Table-S2, except for antigens marked with **
** Antigenicity evidence found only in Mus musculus (http://www.ncbi.nlm.nih.gov/pubmed/12709028, http://www.ncbi.nlm.nih.gov/pubmed/7689612)
