# Supplementary material for: Diagnostic Peptide Discovery: Prioritization of Pathogen Diagnostic Markers Using Multiple Features
Source: PLoS One. 2012 Dec 14;7(12):e50748. doi: 10.1371/journal.pone.0050748 (PMC3522711; doi:10.1371/journal.pone.0050748)
Supplement: Table S3 — Complete list of peptides included in the array, showing the reactivity (1) or lack of reactivity (0) against different serum samples. The criteria for considering a peptide reactive is similar to that shown in Figure 3. Data available in File: Table S3.xls (XLS) [file pone.0050748.s006.xls]

## Sheet: Sheet1
Carmona SJ, Sartor P, Leguizamon MS, Campetella OE, Aguero F (2012). Supplementary Table 3.						Chagas					Healthy					Leishmaniosis
JPT_ID	Gene ID	Product Description	Sequence	Category	prioritizationScore	TcP1	TcP2	TcP3	TcP4	TcP5	NegP1	NegP2	NegP3	NegP4	NegP5	LeishP1	LeishP2
51	Tc00.1047053508175.329	60S ribosomal protein L19, putative	PAKAAAAPAKAA	high-scoring	10.568	1	1	1	0	1	0	0	0	0	0	0	0
80	Tc00.1047053509149.40	60S ribosomal protein L19, putative	APPAKAAAPPAK	high-scoring	12.84	1	1	1	0	1	0	0	0	0	0	0	0
146	Tc00.1047053504159.10	hypothetical protein, conserved	APAVGGFGSAAH	high-scoring	6.914	1	1	1	0	1	0	0	0	0	0	0	0
187	Tc00.1047053505975.20	trans-sialidase, putative	KPAEPKSAEPKP	curated	13.101	1	1	1	0	1	0	0	0	0	0	0	0
188	Tc00.1047053505975.20	trans-sialidase, putative	AEPKSAEPKPAE	curated	13.098	1	1	1	0	1	0	0	0	0	0	0	0
110	Tc00.1047053506239.30	lectin, putative	EQPQHYEQPQQH	high-scoring	13.542	0	1	1	0	1	0	0	0	0	0	0	0
116	Tc00.1047053511671.50	hypothetical protein, conserved	ESPFKSVFGAPS	high-scoring	7.102	0	1	1	0	1	0	0	0	0	0	0	0
202	Tc00.1047053506303.80	hypothetical protein, conserved	ATKVAEAEKQKA	curated	8.232	0	1	1	0	1	0	0	0	0	0	0	0
204	Tc00.1047053506303.80	hypothetical protein, conserved	KQKAAEATKVAE	curated	8.241	1	1	0	0	1	0	0	0	0	0	0	0
1	Tc00.1047053511633.79	microtubule-associated protein, putative	DVGPRHVDPDHF	high-scoring	11.475	1	1	0	0	0	0	0	0	0	0	0	0
32	Tc00.1047053510305.70	hypothetical protein, conserved	PRPGGFPVVGMP	high-scoring	8.618	0	1	0	1	0	0	0	0	0	0	0	0
45	Tc00.1047053508175.329	60S ribosomal protein L19, putative	AAAAPAKAAAAP	high-scoring	10.675	1	0	0	0	1	0	0	0	0	0	0	0
49	Tc00.1047053508175.329	60S ribosomal protein L19, putative	AKAATAPAKAAA	high-scoring	8.939	0	0	1	0	1	0	0	0	0	0	0	0
105	Tc00.1047053508831.150	hypothetical protein, conserved	EKPPAESPFKSV	high-scoring	8.153	1	0	0	0	1	0	0	0	0	0	0	0
107	Tc00.1047053508831.150	hypothetical protein, conserved	FGAPSSTAAKPP	high-scoring	7.732	1	1	0	0	0	0	0	0	0	0	0	0
108	Tc00.1047053506239.30	lectin, putative	HEQPQHYEQPQH	high-scoring	12.987	0	0	1	0	1	0	0	0	0	0	0	0
199	Tc00.1047053508831.140	surface antigen 2 (CA-2), putative	DKPSPFGQAAAG	curated	8.657	0	0	1	0	1	0	0	0	0	0	0	0
200	Tc00.1047053508831.140	surface antigen 2 (CA-2), putative	GKPSPFGQAAAG	curated	8.237	0	0	1	0	1	0	0	0	0	0	0	0
211	Tc00.1047053506659.10	immunodominant antigen, putative,tc40 antigen-like, putative	AKAAAPPAAARS	curated	3.966	1	0	0	0	1	0	0	0	0	0	0	0
34	Tc00.1047053506177.20	lectin, putative	QYEQPQQHYEQP	high-scoring	12.745	0	0	1	0	0	0	0	0	0	0	0	0
37	Tc00.1047053506177.20	lectin, putative	QPQQHEQPQQYE	high-scoring	12.943	0	0	1	0	0	0	0	0	0	0	0	0
54	Tc00.1047053508385.10	hypothetical protein, conserved	GQYSPQHPQWNA	high-scoring	8.002	0	0	0	1	0	0	0	0	0	0	0	0
61	Tc00.1047053506791.30	hypothetical protein, conserved	DPGPPVPAFTFA	high-scoring	7.34	0	0	0	1	0	0	0	0	0	0	0	0
66	Tc00.1047053510217.10	hypothetical protein	SPEPSAAWRNFA	high-scoring	9.23	0	0	0	1	0	0	0	0	0	0	0	0
76	Tc00.1047053506559.559	antigenic protein, putative	RQPFVLPEPQET	high-scoring	10.345	0	0	0	0	1	0	0	0	0	0	0	0
87	Tc00.1047053506959.90	hypothetical protein, conserved	TAPAAPEPPRTA	high-scoring	9.456	1	0	0	0	0	0	0	0	0	0	0	0
93	Tc00.1047053508677.60	hypothetical protein	RGGPCPPNPAPP	high-scoring	11.676	0	0	1	0	0	0	0	0	0	0	0	0
106	Tc00.1047053508831.150	hypothetical protein, conserved	SPFKSVFGAPSS	high-scoring	7.298	1	1	1	0	0	0	0	0	0	0	0	1
109	Tc00.1047053506239.30	lectin, putative	HYEQPQHYEQPQ	high-scoring	13.485	0	0	1	0	0	0	0	0	0	0	0	0
117	Tc00.1047053511671.50	hypothetical protein, conserved	VFGAPSSTAAKP	high-scoring	7.344	0	0	0	0	1	0	0	0	0	0	0	0
135	Tc00.1047053506147.190	hypothetical protein, conserved	PSKPSPKAAPKK	high-scoring	9.824	0	0	0	0	1	0	0	0	0	0	0	0
142	Tc00.1047053510565.11	tyrosine aminotransferase, putative	KPSPSPKPIIKL	high-scoring	7.98	0	1	0	0	0	0	0	0	0	0	0	0
149	Tc00.1047053510877.40	hypothetical protein, conserved	RGGRGGGRGNNS	high-scoring	12.128	0	0	0	1	0	0	0	0	0	0	0	0
155	Tc00.1047053511861.120	hypothetical protein	PRPCVPDGGPTD	high-scoring	9.845	0	0	0	1	0	0	0	0	0	0	0	0
156	Tc00.1047053511861.120	hypothetical protein	VPDGGPTDVWTG	high-scoring	10.259	0	0	0	1	0	0	0	0	0	0	0	0
167	Tc00.1047053504625.70	kinetoplast DNA-associated protein, putative	VAREEAARRMHE	high-scoring	9.559	0	0	1	0	0	0	0	0	0	0	0	0
183	Tc00.1047053503975.100	hypothetical protein, conserved	AGPYGGMGGNGA	high-scoring	7.017	0	0	0	1	0	0	0	0	0	0	0	0
203	Tc00.1047053506303.80	hypothetical protein, conserved	AEAEKQKAAEAT	curated	8.268	0	0	0	0	1	0	0	0	0	0	0	0
209	Tc00.1047053508355.250	60S acidic ribosomal protein P0	EDDDDDFGMGA	curated	8.066	0	1	0	0	0	0	0	0	0	0	0	0
217	Tc00.1047053503419.30	thiol-dependent reductase 1, putative,thiol transferase, putative,glutathione S-transferase, putative	SRYIDRISSPAN	curated	1.732	0	1	0	0	0	0	0	0	0	0	0	0
221	Tc00.1047053509391.30	calcium-binding protein, putative	RIRQAIPREKTA	curated	7.633	0	1	0	0	0	0	0	0	0	0	0	0
229	Tc00.1047053507603.260	cysteine peptidase, putative,cysteine peptidase, clan CA, family C1, cathepsin L-like, putative	APGPSPSYFVQM	high-scoring	11.647	0	0	1	0	0	0	0	0	0	0	0	0
248	Tc00.1047053463155.20	retrotransposon hot spot (RHS) protein, putative	PRVLIGTPGIGN	high-scoring	7.556	0	0	1	0	0	0	0	0	0	0	0	0
250	Tc00.1047053507511.91	mucin TcMUCIII, putative	ENKPATGEAPSQ	curated	6.883	0	0	0	0	1	0	0	0	0	0	0	0
251	Tc00.1047053507511.91	mucin TcMUCIII, putative	KPATGEAPSQPG	curated	7.288	0	0	0	0	1	0	0	0	0	0	0	0
252	Tc00.1047053511815.170	hypothetical protein, conserved	KEEVPEEVNAPE	high-scoring	10.093	0	0	0	0	1	0	0	0	0	0	0	0
3	Tc00.1047053511633.79	microtubule-associated protein, putative	KRALPQEEEEDV	high-scoring	11.655	0	0	0	0	0	0	0	0	0	0	0	0
4	Tc00.1047053506685.40	hypothetical protein, conserved	PQPGYGAPQPGY	high-scoring	8.918	0	0	0	0	0	0	0	0	0	0	0	0
5	Tc00.1047053506685.40	hypothetical protein, conserved	GYGAPQPGYGAP	high-scoring	8.864	0	0	0	0	0	0	0	0	0	0	0	0
6	Tc00.1047053506495.40	hypothetical protein	EGSSQERSGVGS	high-scoring	14.437	0	0	0	0	0	0	0	0	0	0	0	0
8	Tc00.1047053506495.40	hypothetical protein	FMSEGSSKERSE	high-scoring	14.659	0	0	0	0	0	0	0	0	0	0	0	0
9	Tc00.1047053506495.40	hypothetical protein	RSGVGSFMSEGS	high-scoring	14.062	0	0	0	0	0	0	0	0	0	0	0	0
10	Tc00.1047053509157.120	hypothetical protein, conserved	ASVPEEHRGSRK	high-scoring	10.472	0	0	0	0	0	0	0	0	0	0	0	0
12	Tc00.1047053509157.120	hypothetical protein, conserved	VSGAVPEGEEYP	high-scoring	10.715	0	0	0	0	0	0	0	0	0	0	0	0
14	Tc00.1047053509157.120	hypothetical protein, conserved	HRGSRKVSGAVP	high-scoring	10.247	0	0	0	0	0	0	0	0	0	0	0	0
15	Tc00.1047053508443.60	hypothetical protein, conserved	VPEGEEYPTGAE	high-scoring	10.811	0	0	0	0	0	0	0	0	0	0	0	0
16	Tc00.1047053508443.60	hypothetical protein, conserved	RPVAADEDGHAP	high-scoring	10.964	0	0	0	0	0	0	0	0	0	0	0	0
17	Tc00.1047053508443.60	hypothetical protein, conserved	GHAPETASVPEE	high-scoring	10.931	0	0	0	0	0	0	0	0	0	0	0	0
18	Tc00.1047053510247.10	R27-2 protein, putative	SHPELCDSASPQ	high-scoring	10.012	0	0	0	0	0	0	0	0	0	0	0	0
20	Tc00.1047053510247.10	R27-2 protein, putative	ADNEKLTEDLAQ	high-scoring	10.355	0	0	0	0	0	0	0	0	0	0	0	0
22	Tc00.1047053510247.10	R27-2 protein, putative	READNEKLAEDL	high-scoring	10.274	0	0	0	0	0	0	0	0	0	0	0	0
23	Tc00.1047053509153.20	hypothetical protein, conserved	GMPRPGGFPAVG	high-scoring	8.841	0	0	0	0	0	0	0	0	0	0	0	0
24	Tc00.1047053509153.20	hypothetical protein, conserved	GFPVVGMPRPGG	high-scoring	9.789	0	0	0	0	0	0	0	0	0	0	0	0
25	Tc00.1047053509153.20	hypothetical protein, conserved	MPRPGGFSGGGI	high-scoring	10.425	0	0	0	0	0	0	0	0	0	0	0	0
26	Tc00.1047053509663.20	hypothetical protein, conserved	APQPGYGAPQPG	high-scoring	8.615	0	0	0	0	0	0	0	0	0	0	0	0
27	Tc00.1047053509663.20	hypothetical protein, conserved	GAPQPGYGAPQP	high-scoring	8.642	0	0	0	0	0	0	0	0	0	0	0	0
28	Tc00.1047053510305.70	hypothetical protein, conserved	SFAGGGMPRPGG	high-scoring	10.994	0	0	0	0	0	0	0	0	0	0	0	0
33	Tc00.1047053506177.20	lectin, putative	EQPQQYEQPQQH	high-scoring	12.796	0	0	0	0	0	0	0	0	0	0	0	0
35	Tc00.1047053506177.20	lectin, putative	QHYEQPQQHEQP	high-scoring	12.841	0	0	0	0	0	0	0	0	0	0	0	0
36	Tc00.1047053506177.20	lectin, putative	QPQHYEQPQQHE	high-scoring	12.628	0	0	0	0	0	0	0	0	0	0	0	0
38	Tc00.1047053438923.10	hypothetical protein	GSSQERSGVGSS	high-scoring	13.235	0	0	0	0	0	0	0	0	0	0	0	0
39	Tc00.1047053438923.10	hypothetical protein	SGVGSSMSEGSS	high-scoring	13.301	0	0	0	0	0	0	0	0	0	0	0	0
40	Tc00.1047053438923.10	hypothetical protein	MSEGSSQERSGV	high-scoring	13.412	0	0	0	0	0	0	0	0	0	0	0	0
41	Tc00.1047053414243.20	hypothetical protein, conserved	VPAPPTAAVPVP	high-scoring	7.44	0	0	0	0	0	0	0	0	0	0	0	0
42	Tc00.1047053414243.20	hypothetical protein, conserved	AAVPVPPTAAVP	high-scoring	7.323	0	0	0	0	0	0	0	0	0	0	0	0
43	Tc00.1047053414243.20	hypothetical protein, conserved	PTAAVPVPPTAA	high-scoring	7.314	0	0	0	0	0	0	0	0	0	0	0	0
50	Tc00.1047053508175.329	60S ribosomal protein L19, putative	KAATAPAKAAAA	high-scoring	9.91	1	0	1	0	0	0	0	0	0	1	0	0
53	Tc00.1047053508385.10	hypothetical protein, conserved	VILPGPGQYSPQ	high-scoring	7.933	0	0	0	0	0	0	0	0	0	0	0	0
55	Tc00.1047053508385.10	hypothetical protein, conserved	NAPGPGEYHHPI	high-scoring	8.767	0	0	0	0	0	0	0	0	0	0	0	0
56	Tc00.1047053508385.10	hypothetical protein, conserved	EYHHPIDPGPPV	high-scoring	8.521	0	0	0	0	0	0	0	0	0	0	0	0
57	Tc00.1047053503453.70	hypothetical protein, conserved	PRAAPAAPEPPR	high-scoring	8.202	0	0	0	0	0	0	0	0	0	0	0	0
58	Tc00.1047053503453.70	hypothetical protein, conserved	EPPRAAPAAPEP	high-scoring	8.304	0	0	0	0	0	0	0	0	0	0	0	0
59	Tc00.1047053506791.30	hypothetical protein, conserved	PGPGTYNPTISP	high-scoring	8.162	0	0	0	0	0	0	0	0	0	0	0	0
60	Tc00.1047053506791.30	hypothetical protein, conserved	EQSGQDGDVPGP	high-scoring	8.978	0	0	0	0	0	0	0	0	0	0	0	0
62	Tc00.1047053506721.30	calpain-like cysteine peptidase, putative,cysteine peptidase, Clan CA, family C2, putative	NIFLDPQPEGVP	high-scoring	8.591	0	0	0	0	0	0	0	0	0	0	0	0
64	Tc00.1047053507447.19	microtubule-associated protein, putative	PQEEQEDVGPRH	high-scoring	11.484	0	0	0	0	0	0	0	0	0	0	0	0
65	Tc00.1047053510217.10	hypothetical protein	WTPNSPEPSAA	high-scoring	9.656	0	0	0	0	0	0	0	0	0	0	0	0
67	Tc00.1047053510217.10	hypothetical protein	FTHWTPNNPEPS	high-scoring	9.446	0	0	0	0	0	0	0	0	0	0	0	0
69	Tc00.1047053508693.190	hypothetical protein, conserved	EEATKRHQAEEE	high-scoring	10.941	0	0	0	0	0	0	0	0	0	0	0	0
70	Tc00.1047053508693.190	hypothetical protein, conserved	HQAEEEATKRRQ	high-scoring	10.899	0	0	0	0	0	0	0	0	0	0	0	0
71	Tc00.1047053506605.174	hypothetical protein, conserved	AVPAPPTAAVPV	high-scoring	7.364	0	0	0	0	0	0	0	0	0	0	0	0
72	Tc00.1047053506605.174	hypothetical protein, conserved	AVPVPPTAAVPA	high-scoring	7.307	0	0	0	0	0	0	0	0	0	0	0	0
75	Tc00.1047053508693.190	hypothetical protein, conserved	ATKRHQAEEEAT	high-scoring	10.947	0	0	0	0	0	0	0	0	0	0	0	0
77	Tc00.1047053506559.559	antigenic protein, putative	NDSPRAPLDEPP	high-scoring	11.833	0	0	0	0	0	0	0	0	0	0	0	0
78	Tc00.1047053511233.160	hypothetical protein	TDPSPPATLQAQ	high-scoring	15.285	0	0	0	0	0	0	0	0	0	0	0	0
79	Tc00.1047053511233.160	hypothetical protein	LQAQNPAPSGEL	high-scoring	15.778	0	0	0	0	0	0	0	0	0	0	0	0
81	Tc00.1047053506495.50	hypothetical protein	SEGSSQERSGVG	high-scoring	14.74	0	0	0	0	0	0	0	0	0	0	0	0
82	Tc00.1047053506495.50	hypothetical protein	ERSGVGSFMSEG	high-scoring	14.062	0	0	0	0	0	0	0	0	0	0	0	0
83	Tc00.1047053506495.50	hypothetical protein	SFMSEGSSKERS	high-scoring	14.494	0	0	0	0	0	0	0	0	0	0	0	0
84	Tc00.1047053508153.410	hypothetical protein, conserved	ESPKKPSIASAP	high-scoring	8.585	0	0	0	0	0	0	0	0	0	0	0	0
85	Tc00.1047053508153.410	hypothetical protein, conserved	PADKPAAPSNPF	high-scoring	7.898	0	0	0	0	0	0	0	0	0	0	0	0
86	Tc00.1047053508153.410	hypothetical protein, conserved	GGAAPADKPAAP	high-scoring	8.018	0	0	0	0	0	0	0	0	0	0	0	0
94	Tc00.1047053508677.60	hypothetical protein	GPCPPNPAPPLS	high-scoring	11.688	0	0	0	0	0	0	0	0	0	0	0	0
95	Tc00.1047053503413.4	hypothetical protein, conserved	KPEEKKPEGAKP	high-scoring	9.465	0	0	0	0	0	0	0	0	0	0	0	0
97	Tc00.1047053503413.4	hypothetical protein, conserved	GAKPEENKPEGA	high-scoring	9.66	0	0	0	0	0	0	0	0	0	0	0	0
98	Tc00.1047053503413.4	hypothetical protein, conserved	KPEGAKPKENKP	high-scoring	9.468	0	0	0	0	0	0	0	0	0	0	0	0
99	Tc00.1047053511821.179	hypothetical protein, conserved	EELRAEDEHKTR	high-scoring	10.763	0	0	0	0	0	0	0	0	0	0	0	0
101	Tc00.1047053511821.179	hypothetical protein, conserved	VSEQAEDLQRQL	high-scoring	10.214	0	0	0	0	0	0	0	0	0	0	0	0
103	Tc00.1047053511821.179	hypothetical protein, conserved	GVLPPQGGAADF	high-scoring	11.24	0	0	0	0	0	0	0	0	0	0	0	0
111	Tc00.1047053506239.30	lectin, putative	PQHYEQPQQHEQ	high-scoring	13.746	0	0	0	0	0	0	0	0	0	0	0	0
112	Tc00.1047053504019.3	hypothetical protein	ERDDAVAENSVP	high-scoring	9.591	0	0	0	0	0	0	0	0	0	0	0	0
113	Tc00.1047053504019.3	hypothetical protein	NSVPQKERDDAV	high-scoring	10.023	0	0	0	0	0	0	0	0	0	0	0	0
114	Tc00.1047053511605.55	hypothetical protein	SAAPESPPDPEP	high-scoring	14.483	0	0	0	0	0	0	0	0	0	0	0	0
115	Tc00.1047053511605.55	hypothetical protein	AGMPAPLSSATP	high-scoring	11.969	0	0	0	0	0	0	0	0	0	0	0	0
118	Tc00.1047053511671.50	hypothetical protein, conserved	AAKPPAESPFKS	high-scoring	6.729	0	0	0	0	0	0	0	0	0	0	0	0
119	Tc00.1047053510143.24	Hsc70-interacting protein (Hip), putative	AGGFPGGAGGFP	high-scoring	8.939	0	0	0	0	0	0	0	0	0	0	0	0
120	Tc00.1047053510143.24	Hsc70-interacting protein (Hip), putative	GFPGGAGGFPGG	high-scoring	8.675	0	0	0	0	0	0	0	0	0	0	0	0
121	Tc00.1047053510143.24	Hsc70-interacting protein (Hip), putative	PGGAGGFPGGAG	high-scoring	8.354	0	0	0	0	0	0	0	0	0	0	0	0
122	Tc00.1047053508173.110	cysteine protease, putative	GGCADDPNITI	high-scoring	10.778	0	0	0	0	0	0	0	0	0	0	0	0
123	Tc00.1047053508173.110	cysteine protease, putative	YDVAYPVVTKPP	high-scoring	10.966	0	0	0	0	0	0	0	0	0	0	0	0
125	Tc00.1047053509705.10	cellulosomal scaffoldin anchoring protein, putative	QTEKRTGTPAYT	high-scoring	9.802	0	0	0	0	0	0	0	0	0	0	0	0
126	Tc00.1047053509705.10	cellulosomal scaffoldin anchoring protein, putative	GTPAYTALPTLM	high-scoring	8.894	0	0	0	0	0	0	0	0	0	0	0	0
127	Tc00.1047053509705.10	cellulosomal scaffoldin anchoring protein, putative	ALPTLMEAEKRT	high-scoring	7.721	0	0	0	0	0	0	0	0	0	0	0	0
128	Tc00.1047053508853.30	hypothetical protein	AQNPAPSGELQG	high-scoring	14.314	0	0	0	0	0	0	0	0	0	0	0	0
129	Tc00.1047053510801.10	calpain-like cysteine peptidase, putative	DPDPDGVPLSDL	high-scoring	10.213	0	0	0	0	0	0	0	0	0	0	0	0
130	Tc00.1047053510801.10	calpain-like cysteine peptidase, putative	DGVPLSDLPINE	high-scoring	9.787	0	0	0	0	0	0	0	0	0	0	0	0
131	Tc00.1047053508595.20	UDP-Gal or UDP-GlcNAc-dependent glycosyltransferase, putative	AADDGAPGPNNP	high-scoring	11.294	0	0	0	0	0	0	0	0	0	0	0	0
133	Tc00.1047053506147.190	hypothetical protein, conserved	RKPSKPSPKAAP	high-scoring	9.662	0	0	0	0	0	0	0	0	0	0	0	0
136	Tc00.1047053505985.9	calpain cysteine peptidase, putative	YLDPAPAGVPLS	high-scoring	8.396	0	0	0	0	0	0	0	0	0	0	0	0
137	Tc00.1047053505985.9	calpain cysteine peptidase, putative	DQKPEGVPLREL	high-scoring	8.705	0	0	0	0	0	0	0	0	0	0	0	0
138	Tc00.1047053505985.9	calpain cysteine peptidase, putative	EGVPLRELPLDD	high-scoring	8.711	0	0	0	0	0	0	0	0	0	0	0	0
139	Tc00.1047053505985.9	calpain cysteine peptidase, putative	LRELPLDDDSDF	high-scoring	8.753	0	0	0	0	0	0	0	0	0	0	0	0
140	Tc00.1047053510565.11	tyrosine aminotransferase, putative	SDNAKPSPSPKP	high-scoring	8.235	0	0	0	0	0	0	0	0	0	0	0	0
141	Tc00.1047053510565.11	tyrosine aminotransferase, putative	NAKPSPSPKPI	high-scoring	8.259	0	0	0	0	0	0	0	0	0	0	0	0
143	Tc00.1047053510565.11	tyrosine aminotransferase, putative	SPSPKPIIKLSV	high-scoring	7.287	0	0	0	0	0	0	0	0	0	0	0	0
145	Tc00.1047053510733.50	hypothetical protein, conserved	DRGGRGFGDRGG	high-scoring	9.159	0	0	0	0	0	0	0	0	0	0	0	0
148	Tc00.1047053510877.40	hypothetical protein, conserved	DPEPGESAGENR	high-scoring	9.954	0	0	0	0	0	0	0	0	0	0	0	0
150	Tc00.1047053510877.40	hypothetical protein, conserved	GASRSGRGGNGR	high-scoring	13.187	0	0	0	0	0	0	0	0	0	0	0	0
151	Tc00.1047053510877.40	hypothetical protein, conserved	GGSRGGSRNDAA	high-scoring	13.421	0	0	0	0	0	0	0	0	0	0	0	0
152	Tc00.1047053506567.140	hypothetical protein, conserved	TASVPAPPTASV	high-scoring	6.47	0	0	0	0	0	0	0	0	0	0	0	0
153	Tc00.1047053506567.140	hypothetical protein, conserved	SVPAPPTASVPA	high-scoring	6.63	0	0	0	0	0	0	0	0	0	0	0	0
154	Tc00.1047053511861.120	hypothetical protein	PVPAKTLMSVH	high-scoring	8.897	0	0	0	0	0	0	0	0	0	0	0	0
157	Tc00.1047053511693.30	hypothetical protein, conserved	VPDASDEPPVAV	high-scoring	8.092	0	0	0	0	0	0	0	0	0	0	0	0
158	Tc00.1047053511693.30	hypothetical protein, conserved	EPPVAVKQRGRP	high-scoring	7.876	0	0	0	0	0	0	0	0	0	0	0	0
159	Tc00.1047053508247.110	serine-alanine-and proline-rich protein, putative	GPAKPAEERPPVD	high-scoring	14.183	0	0	0	0	0	0	0	0	0	0	0	0
160	Tc00.1047053506337.90	hypothetical protein	PAENRPQLGAGD	high-scoring	13.435	0	0	0	0	0	0	0	0	0	0	0	0
161	Tc00.1047053506337.90	hypothetical protein	RPQLGAGDAQPG	high-scoring	13.957	0	0	0	0	0	0	0	0	0	0	0	0
162	Tc00.1047053506337.90	hypothetical protein	AATPQNKPPDHT	high-scoring	15.159	0	0	0	0	0	0	0	0	0	0	0	0
163	Tc00.1047053508673.20	UDP-Gal or UDP-GlcNAc-dependent glycosyltransferase, putative	GAPGPNNPHHSQ	high-scoring	11.297	0	0	0	0	0	0	0	0	0	0	0	0
164	Tc00.1047053506999.140	hypothetical protein, conserved	AEQEEEARRRAE	high-scoring	7.733	0	0	0	0	0	0	0	0	0	0	0	0
165	Tc00.1047053509013.10	calpain-like cysteine peptidase, putative	DPEPLGVPLDDL	high-scoring	7.332	0	0	0	0	0	0	0	0	0	0	0	0
166	Tc00.1047053504625.70	kinetoplast DNA-associated protein, putative	RMHEVAEEGAAR	high-scoring	10.957	0	0	0	0	0	0	0	0	0	0	0	0
169	Tc00.1047053503865.60	hypothetical protein, conserved	RHQAEEEAAKRR	high-scoring	9.821	0	0	0	0	0	0	0	0	0	0	0	0
170	Tc00.1047053509977.40	hypothetical protein	GAPPSPLPIPPA	high-scoring	12.972	0	0	0	0	0	0	0	0	0	0	0	0
171	Tc00.1047053509977.40	hypothetical protein	LPIPPAPTGPIN	high-scoring	12.98	0	0	0	0	0	0	0	0	0	0	0	0
172	Tc00.1047053510877.30	hypothetical protein, conserved	GGPDRRNDRRVD	high-scoring	13.357	0	0	0	0	0	0	0	0	0	0	0	0
174	Tc00.1047053506441.20	hypothetical protein, conserved	KEDSRRERSGRE	high-scoring	9.621	0	0	0	0	0	0	0	0	0	0	0	0
176	Tc00.1047053506441.20	hypothetical protein, conserved	GRERGYPEEKED	high-scoring	9.798	0	0	0	0	0	0	0	0	0	0	0	0
177	Tc00.1047053506441.20	hypothetical protein, conserved	VPSQPHSTPHSD	high-scoring	7.547	0	0	0	0	0	0	0	0	0	0	0	0
181	Tc00.1047053506855.250	hypothetical protein, conserved	ENEAAVPKPDGN	high-scoring	9.446	0	0	0	0	0	0	0	0	0	0	0	0
182	Tc00.1047053506855.250	hypothetical protein, conserved	LNFSPSPSTSPN	high-scoring	9.188	0	0	0	0	0	0	0	0	0	0	0	0
184	Tc00.1047053503975.100	hypothetical protein, conserved	GKKPEGKKPEDA	high-scoring	9.456	0	0	0	0	0	0	0	0	0	0	0	0
185	Tc00.1047053507639.20	universal minicircle sequence binding protein (UMSBP), putative	DCPNAPPGGERA	high-scoring	8.865	0	0	0	0	0	0	0	0	0	0	0	0
186	Tc00.1047053503781.90	universal minicircle sequence binding protein (UMSBP), putative	ARDCPNAPPGGE	high-scoring	8.804	0	0	0	0	0	0	0	0	0	0	0	0
193	Tc00.1047053511211.170	heat shock protein 70 (HSP70), putative	GGMPGGMPGGMP	curated	11.278	0	0	0	0	0	0	0	0	0	0	0	0
194	Tc00.1047053511211.170	heat shock protein 70 (HSP70), putative	MPGGMPGGMPGG	curated	11.416	0	0	0	0	0	0	0	0	0	0	0	0
195	Tc00.1047053510787.10	trans-sialidase, putative	PSTPAGNSATRM	curated	12.95	0	0	0	0	0	0	0	0	0	0	0	0
198	Tc00.1047053507085.30	trans-sialidase, putative	QPIYGSTPVTPT	curated	9.637	0	0	0	0	0	0	0	0	0	0	0	0
205	Tc00.1047053511211.160	heat shock protein 70 (HSP70), putative	GMPGGMPGGMPG	curated	10.279	0	0	0	0	0	0	0	0	0	0	0	0
206	Tc00.1047053511211.160	heat shock protein 70 (HSP70), putative	PGGMPGGMPGGM	curated	10.597	0	0	0	0	0	0	0	0	0	0	0	0
207	Tc00.1047053508413.68	kinetoplastid membrane protein KMP-11	FADKPDESTLSP	curated	5.266	0	0	0	0	0	0	0	0	0	0	0	0
208	Tc00.1047053508355.250	60S acidic ribosomal protein P0	EPEEEDDDDDFG	curated	8.606	0	0	0	0	0	0	0	0	0	0	0	0
210	Tc00.1047053510665.10	hypothetical protein, conserved	EEVLRKHPDKVE	curated	0.182	0	0	0	0	0	0	0	0	0	0	0	0
212	Tc00.1047053510755.89	kinetoplastid membrane protein KMP-11, putative	MATTLEEFSAKL	curated	3.16	0	0	0	0	0	0	0	0	0	0	0	0
213	Tc00.1047053510755.89	kinetoplastid membrane protein KMP-11, putative	NKKFFADKPDES	curated	4.549	0	0	0	0	0	0	0	0	0	0	0	0
216	Tc00.1047053503419.30	thiol-dependent reductase 1, putative,thiol transferase, putative,glutathione S-transferase, putative	LNPRETVPTLQV	curated	2.557	0	0	0	0	0	0	0	0	0	0	0	0
218	Tc00.1047053503419.30	thiol-dependent reductase 1, putative,thiol transferase, putative,glutathione S-transferase, putative	FNEEKRKSVDNN	curated	2.893	0	0	0	0	0	0	0	0	0	0	0	0
219	Tc00.1047053509391.30	calcium-binding protein, putative	GKNAKDRKEAWE	curated	7.942	0	0	0	0	0	0	0	0	0	0	0	0
222	Tc00.1047053509227.10	mucin TcMUCI, putative	AEGGGQKQENTT	curated	4.017	0	0	0	0	0	0	0	0	0	0	0	0
223	Tc00.1047053510685.10	calreticulin, putative	WDNEPAMIPDAD	curated	12.124	0	0	0	0	0	0	0	0	0	0	0	0
224	Tc00.1047053509013.10	calpain-like cysteine peptidase, putative	VPLKEIPLDVDP	curated	8.16	0	0	0	0	0	0	0	0	0	0	0	0
225	Tc00.1047053509013.10	calpain-like cysteine peptidase, putative	EDVPLGRDPKF	curated	7.983	0	0	0	0	0	0	0	0	0	0	0	0
226	Tc00.1047053511257.80	hypothetical protein	DGTIPAPARSSD	curated	10.814	0	0	0	0	0	0	0	0	0	0	0	0
227	Tc00.1047053511257.80	hypothetical protein	ENVAPTPSNRKP	curated	12.725	0	0	0	0	0	0	0	0	0	0	0	0
230	Tc00.1047053507603.260	cysteine peptidase, putative,cysteine peptidase, clan CA, family C1, cathepsin L-like, putative	HCSGPSVRSSVP	high-scoring	10.458	0	0	0	0	0	0	0	0	0	0	0	0
232	Tc00.1047053507041.120	variant-surface-glycoprotein phospholipase C, putative,vsglipase, putative,glycosylphosphatidylinositol-specific phospholipase C	ASSPAAPALNEE	high-scoring	11.48	0	0	0	0	0	0	0	0	0	0	0	0
233	Tc00.1047053506425.10	serine carboxypeptidase S28, putative	STPIIDENPMNE	high-scoring	9.522	0	0	0	0	0	0	0	0	0	0	0	0
234	Tc00.1047053510123.20	mitogen activated protein kinase, putative	SALPSMDVTGEG	high-scoring	11.682	0	0	0	0	0	0	0	0	0	0	0	0
235	Tc00.1047053508827.40	acyl-CoA dehydrogenase, putative	SEIVRSNEAAWD	high-scoring	7.92	0	0	0	0	0	0	0	0	0	0	0	0
236	Tc00.1047053508817.130	carbonic anhydrase-like protein, putative	SANVPSGAQLAG	high-scoring	10.135	0	0	0	0	0	0	0	0	0	0	0	0
238	Tc00.1047053505163.80	oligosaccharyl transferase subunit, putative	SLADGNTWNHEH	high-scoring	2.506	0	0	0	0	0	0	0	0	0	0	0	0
239	Tc00.1047053510243.100	chloride channel protein, putative	FLESYPKSSGPP	high-scoring	10.252	0	0	0	0	0	0	0	0	0	0	0	0
241	Tc00.1047053510095.50	dispersed gene family protein 1 (DGF-1), putative	DACVPAPVPAGP	high-scoring	11.989	0	0	0	0	0	0	0	0	0	0	0	0
242	Tc00.1047053509597.20	carbonic anhydrase-like protein, putative	HKNSSQMEGMSS	high-scoring	10.288	0	0	0	0	0	0	0	0	0	0	0	0
243	Tc00.1047053507953.200	90 kDa surface protein, putative,serine-alanine-and proline-rich protein, putative	AASMPAPLSSAP	high-scoring	14.945	0	0	0	0	0	0	0	0	0	0	0	0
244	Tc00.1047053507953.200	90 kDa surface protein, putative,serine-alanine-and proline-rich protein, putative	SMPAPLSSAPTK	high-scoring	14.972	0	0	0	0	0	0	0	0	0	0	0	0
245	Tc00.1047053508165.310	surface protease GP63, putative	TEMPSPRVQAAP	high-scoring	14.937	0	0	0	0	0	0	0	0	0	0	0	0
246	Tc00.1047053508165.310	surface protease GP63, putative	MPSPRVQAAPQQ	high-scoring	15.244	0	0	0	0	0	0	0	0	0	0	0	0
249	Tc00.1047053463155.20	retrotransposon hot spot (RHS) protein, putative	VLIGTPGIGNSA	high-scoring	7.835	0	0	0	0	0	0	0	0	0	0	0	0
253	Tc00.1047053507927.20	mitochondrial oligo_U binding protein TBRGG1, putative	QGDRGGQRGGGR	high-scoring	7.132	0	0	0	0	0	0	0	0	0	0	0	0
254	Tc00.1047053507927.20	mitochondrial oligo_U binding protein TBRGG1, putative	GRRDYGDQGNQG	high-scoring	7.135	0	0	0	0	0	0	0	0	0	0	0	0
255	Tc00.1047053508719.70	hypothetical protein, conserved	KDLVEAPARPAS	high-scoring	7.776	0	0	0	0	0	0	0	0	0	0	0	0
259	Tc00.1047053510655.120	aminopeptidase P, putative,metallo-peptidase, clan MG, family M24, putative	MTLNNKQNGHKE	polymorphic	4.139	0	0	0	0	0	0	0	0	0	0	0	0
260	Tc00.1047053510655.120	aminopeptidase P, putative,metallo-peptidase, clan MG, family M24, putative	MASNNKQNGHKD	polymorphic	4.139	0	0	0	0	0	0	0	0	0	0	0	0
262	Tc00.1047053510877.30	hypothetical protein, conserved	RGGSNIGASRSG	polymorphic	10.646	0	0	0	0	0	0	0	0	0	0	0	0
263	Tc00.1047053503849.60	NADH-dependent fumarate reductase, putative	DEIAASVFPDPAV	polymorphic	3.073	0	0	0	0	0	0	0	0	0	0	0	0
264	Tc00.1047053503849.60	NADH-dependent fumarate reductase, putative	DEVAASVFPDPAL	polymorphic	3.073	0	0	0	0	0	0	0	0	0	0	0	0
265	Tc00.1047053511385.30	vacuolar-type proton translocating pyrophosphatase 1, putative	AGGEGGKLALKN	polymorphic	7.762	0	0	0	0	0	0	0	0	0	0	0	0
266	Tc00.1047053511385.30	vacuolar-type proton translocating pyrophosphatase 1, putative	AGGEGEKLALKK	polymorphic	7.762	0	0	0	0	0	0	0	0	0	0	0	0
267	Tc00.1047053511385.30	vacuolar-type proton translocating pyrophosphatase 1, putative	DIGAHRLSQKEG	polymorphic	9.016	0	0	0	0	0	0	0	0	0	0	0	0
268	Tc00.1047053511385.30	vacuolar-type proton translocating pyrophosphatase 1, putative	DIDAHRLSQKGG	polymorphic	9.016	0	0	0	0	0	0	0	0	0	0	0	0
269	Tc00.1047053511385.30	vacuolar-type proton translocating pyrophosphatase 1, putative	DANNPLAKGGSN	polymorphic	10.142	0	0	0	0	0	0	0	0	0	0	0	0
270	Tc00.1047053511385.30	vacuolar-type proton translocating pyrophosphatase 1, putative	VANNLLAKDGGN	polymorphic	10.142	0	0	0	0	0	0	0	0	0	0	0	0
271	Tc00.1047053511589.200	S-adenosylhomocysteine hydrolase, putative	ARQADYINCPVD	polymorphic	-0.017	0	0	0	0	0	0	0	0	0	0	0	0
272	Tc00.1047053511589.200	S-adenosylhomocysteine hydrolase, putative	AKQADYINCPVD	polymorphic	-0.017	0	0	0	0	0	0	0	0	0	0	0	0
273	Tc00.1047053511815.170	hypothetical protein, conserved	KELAESQVKKAP	polymorphic	3.709	0	0	0	0	0	0	0	0	0	0	0	0
275	Tc00.1047053509791.180	hypothetical protein, conserved	EESRGGEEKRPT	polymorphic	3.411	0	0	0	0	0	0	0	0	0	0	0	0
276	Tc00.1047053509791.180	hypothetical protein, conserved	KEAKEGAEKTLT	polymorphic	3.411	0	0	0	0	0	0	0	0	0	0	0	0
277	Tc00.1047053507569.10	hypothetical protein, conserved	DSVEKEPTAEEP	polymorphic	6.504	0	0	0	0	0	0	0	0	0	0	0	0
278	Tc00.1047053507569.10	hypothetical protein, conserved	DIVEKEPTAEEP	polymorphic	6.504	0	0	0	0	0	0	0	0	0	0	0	0
279	Tc00.1047053507569.10	hypothetical protein, conserved	TAEEPLRNTEAE	polymorphic	6.435	0	0	0	0	0	0	0	0	0	0	0	0
280	Tc00.1047053507569.10	hypothetical protein, conserved	TAEEPLGNTEAE	polymorphic	6.435	0	0	0	0	0	0	0	0	0	0	0	0
281	Tc00.1047053508707.310	hypothetical protein, conserved,leucine rich repeat protein, putative	TKDGPEKEAEDA	polymorphic	5.389	0	0	0	0	0	0	0	0	0	0	0	0
282	Tc00.1047053508707.310	hypothetical protein, conserved,leucine rich repeat protein, putative	NKDGPEKEAGDV	polymorphic	5.389	0	0	0	0	0	0	0	0	0	0	0	0
284	Tc00.1047053510877.40	hypothetical protein, conserved	RGGNNTGASRSG	polymorphic	11.067	0	0	0	0	0	0	0	0	0	0	0	0
285	Tc00.1047053510685.10	calreticulin, putative	LEEKGDRDKEDL	polymorphic	9.847	0	0	0	0	0	0	0	0	0	0	0	0
286	Tc00.1047053510685.10	calreticulin, putative	LEEKGDGDKEDL	polymorphic	9.847	0	0	0	0	0	0	0	0	0	0	0	0
287	Tc00.1047053511051.70	aminopeptidase, putative,metallo-peptidase, clan MA(E), family M1, putative	TLALAGNSSVVE	polymorphic	0.74	0	0	0	0	0	0	0	0	0	0	0	0
288	Tc00.1047053511051.70	aminopeptidase, putative,metallo-peptidase, clan MA(E), family M1, putative	TLTPTGNSSVVE	polymorphic	0.74	0	0	0	0	0	0	0	0	0	0	0	0
289	Tc00.1047053506355.10	hexose transporter, putative	DANEESALPERQ	polymorphic	6.349	0	0	0	0	0	0	0	0	0	0	0	0
290	Tc00.1047053506355.10	hexose transporter, putative	DTNEESALPEQQ	polymorphic	6.349	0	0	0	0	0	0	0	0	0	0	0	0
291	Tc00.1047053511333.4	cytoskeleton-associated protein CAP5.5, putative	KQPRPEAAAGPT	polymorphic	6.336	0	0	0	0	0	0	0	0	0	0	0	0
292	Tc00.1047053511333.4	cytoskeleton-associated protein CAP5.5, putative	KQPRPGAAAEPT	polymorphic	6.336	0	0	0	0	0	0	0	0	0	0	0	0
293	Tc00.1047053511717.170	ATP-dependent zinc metallopeptidase, putative,metallo-peptidase, clan MA(E), family M41, putative	VSCAPQQNLYSQ	polymorphic	4.196	0	0	0	0	0	0	0	0	0	0	0	0
295	Tc00.1047053511815.170	hypothetical protein, conserved	GSPKELAESQVK	polymorphic	3.442	0	0	0	0	0	0	0	0	0	0	0	0
296	Tc00.1047053511815.170	hypothetical protein, conserved	GSPKELAGIRAQ	polymorphic	3.442	0	0	0	0	0	0	0	0	0	0	0	0
297	Tc00.1047053509791.180	hypothetical protein, conserved	GENKEEESRGGE	polymorphic	4.341	0	0	0	0	0	0	0	0	0	0	0	0
298	Tc00.1047053509791.180	hypothetical protein, conserved	GENKEKEAKEGA	polymorphic	4.341	0	0	0	0	0	0	0	0	0	0	0	0
299	Tc00.1047053511051.70	aminopeptidase, putative,metallo-peptidase, clan MA(E), family M1, putative	ELSFVKVTLALA	polymorphic	0.047	0	0	0	0	0	0	0	0	0	0	0	0
30	Tc00.1047053510305.70	hypothetical protein, conserved	MPRPGGFPVVGM	high-scoring	8.72	0	0	0	1	0	0	0	0	0	0	1	0
31	Tc00.1047053510305.70	hypothetical protein, conserved	FPVVGMPRPGGF	high-scoring	8.906	0	1	1	1	0	1	0	0	0	0	1	0
92	Tc00.1047053511671.60	surface antigen 2 (CA-2), putative	IAAGDKPSPFGQ	high-scoring	8.3	1	1	1	1	1	0	0	1	1	1	0	0
132	Tc00.1047053508595.20	UDP-Gal or UDP-GlcNAc-dependent glycosyltransferase, putative	GAPGPNNPRHPR	high-scoring	11.759	0	0	1	0	0	0	0	0	0	0	0	1
144	Tc00.1047053510733.50	hypothetical protein, conserved	KPSPKAAPKKAM	high-scoring	10.02	0	0	0	0	1	0	0	0	0	0	0	1
173	Tc00.1047053506441.20	hypothetical protein, conserved	RGYPEEKEDSRR	high-scoring	9.87	0	0	1	0	0	0	0	0	0	0	0	1
179	Tc00.1047053506401.320	60S ribosomal protein L7a, putative	KPAAKPAAKPAA	high-scoring	10.512	1	1	1	1	1	0	0	1	1	1	0	0
240	Tc00.1047053511233.20	60S ribosomal protein L34, putative	HAKSQKEKKRRD	high-scoring	10.745	0	0	1	0	0	1	0	0	0	0	0	0
47	Tc00.1047053508175.329	60S ribosomal protein L19, putative	AKAAAAPAKAAA	high-scoring	10.681	1	1	1	0	1	0	0	1	1	1	0	0
63	Tc00.1047053506721.30	calpain-like cysteine peptidase, putative,cysteine peptidase, Clan CA, family C2, putative	APEGIPLSLLKL	high-scoring	7.505	0	0	0	0	0	0	0	0	0	0	0	1
91	Tc00.1047053511671.60	surface antigen 2 (CA-2), putative	PFGQIAAGDKPS	high-scoring	8.159	1	1	1	0	1	0	0	1	1	1	0	0
134	Tc00.1047053506147.190	hypothetical protein, conserved	PVRKPSKPSPKA	high-scoring	9.749	0	0	0	0	0	0	0	0	0	0	0	1
175	Tc00.1047053506441.20	hypothetical protein, conserved	ERSGREGRERGY	high-scoring	9.564	0	1	1	0	0	1	0	0	0	0	0	1
180	Tc00.1047053506401.320	60S ribosomal protein L7a, putative	KPAAKTAAKPAK	high-scoring	9.968	1	1	1	0	1	0	0	1	1	1	0	0
201	Tc00.1047053508831.140	surface antigen 2 (CA-2), putative	PFGQAAAGDKPS	curated	8.249	1	1	1	0	1	0	0	1	1	1	0	0
237	Tc00.1047053508817.130	carbonic anhydrase-like protein, putative	SSAPANKWPHQF	high-scoring	9.828	0	0	0	0	0	0	0	0	0	0	0	1
256	Tc00.1047053508719.70	hypothetical protein, conserved	RCRGVYAPKTGT	high-scoring	6.757	0	1	1	0	0	0	0	1	0	0	0	1
274	Tc00.1047053511815.170	hypothetical protein, conserved	KELAGIRAQKAP	polymorphic	3.709	0	0	0	0	0	0	0	0	0	0	0	1
294	Tc00.1047053511717.170	ATP-dependent zinc metallopeptidase, putative,metallo-peptidase, clan MA(E), family M41, putative	ASYAPQQNVYPQ	polymorphic	4.196	0	0	0	0	0	0	0	0	0	0	1	0
215	Tc00.1047053503419.30	thiol-dependent reductase 1, putative,thiol transferase, putative,glutathione S-transferase, putative	PQWYKELNPRET	curated	3.893	0	0	1	0	0	1	0	0	0	0	0	1
220	Tc00.1047053509391.30	calcium-binding protein, putative	RKEAWERIRQAI	curated	6.967	0	0	1	0	0	0	0	1	0	0	0	1
247	Tc00.1047053511345.10	retrotransposon hot spot (RHS) protein, putative	FPLVDGFFFVDT	high-scoring	4.524	0	0	1	0	0	1	0	0	0	0	0	1
124	Tc00.1047053508173.110	cysteine protease, putative	YPVVTKPPGRGR	high-scoring	11.275	0	0	1	1	0	1	0	1	0	0	0	1
147	Tc00.1047053504159.10	hypothetical protein, conserved	VQPIYAKVRPNF	high-scoring	2.551	1	1	1	0	1	1	0	1	0	1	0	1
300	Tc00.1047053511051.70	aminopeptidase, putative,metallo-peptidase, clan MA(E), family M1, putative	ELSFVKVTLTPT	polymorphic	0.047	1	0	1	0	0	1	0	0	0	0	1	1
2	Tc00.1047053511633.79	microtubule-associated protein, putative	AYRPVDPSAYKR	high-scoring	11.349	1	1	1	1	1	1	0	1	1	1	0	1
231	Tc00.1047053510729.10	AMP deaminase, putative	SVPLRNPRRLPS	high-scoring	9.606	0	0	1	0	0	0	0	1	0	1	0	1
					SUM	23	28	41	14	32	9	0	12	7	10	4	18
					Mean positive spots	27.6					7.6					11
